# Supplementary material
Source: PubMed Central journal article supplement (PMC1183576)

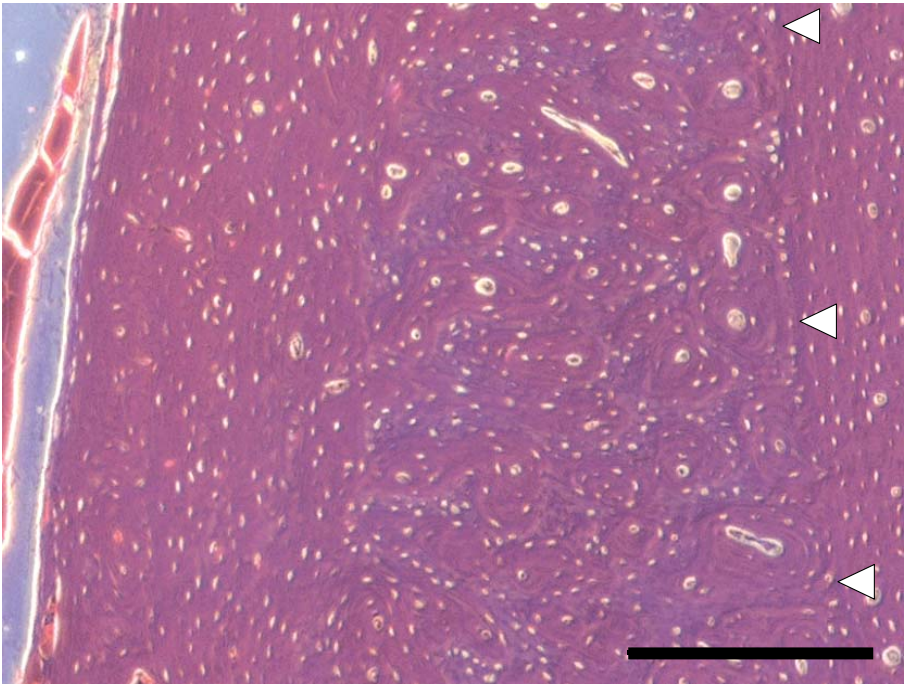

Supplement: pnas_0504705102_2.pdf [file pnas_0504705102_2.pdf]

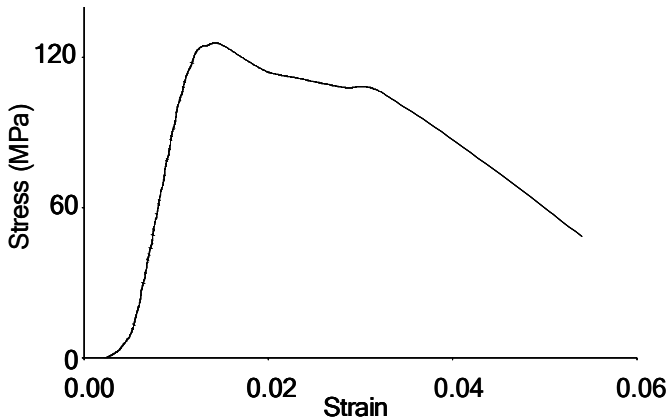

Supplement: pnas_0504705102_3.pdf [file pnas_0504705102_3.pdf]

**A**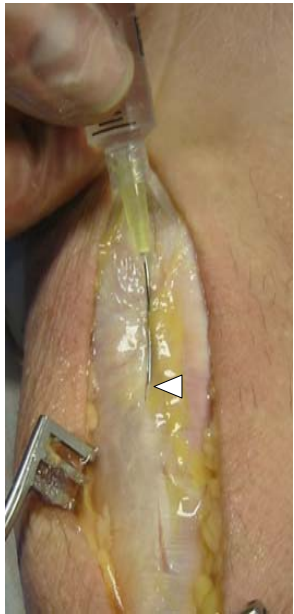**B**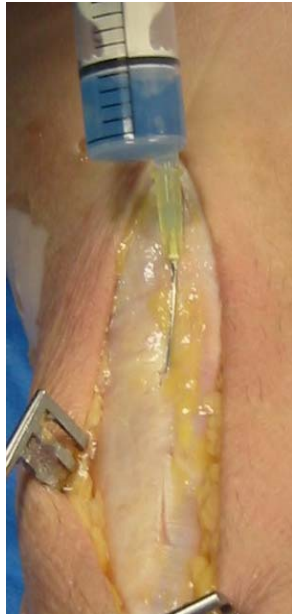**C**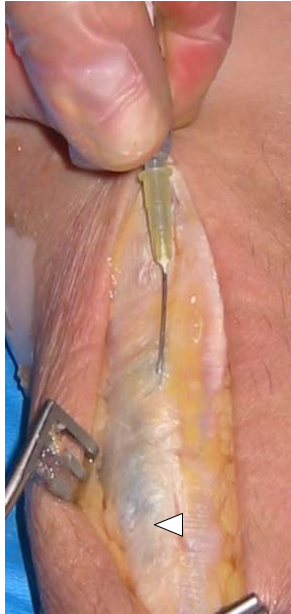**D**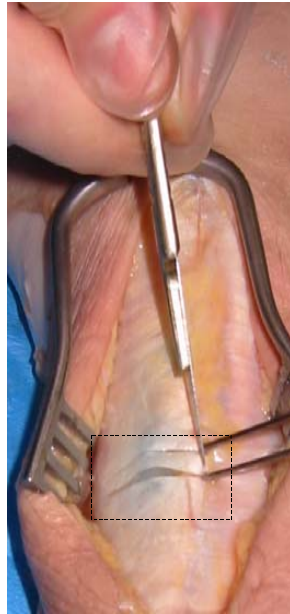**E**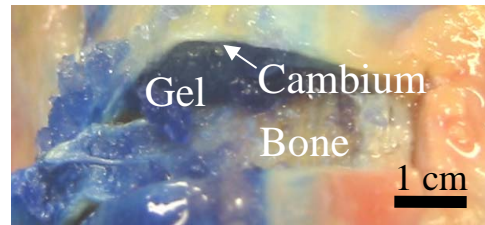

Supplement: pnas_0504705102_5.pdf [file pnas_0504705102_5.pdf]
